# Supplementary material for: Paired evaluation of machine-learning models characterizes effects of confounders and outliers
Source: PubMed Central journal article supplement (PMC10435952; doi:10.1016/j.patter.2023.100791), 2023-07-07
Supplement: mmc1.pdf [file mmc1.pdf]

**Patterns, Volume 4**

**Supplemental information**

**Paired evaluation of machine-learning models  
characterizes effects of confounders and outliers**

**Maulik K. Nariya, Caitlin E. Mills, Peter K. Sorger, and Artem Sokolov**

## Supplementary information

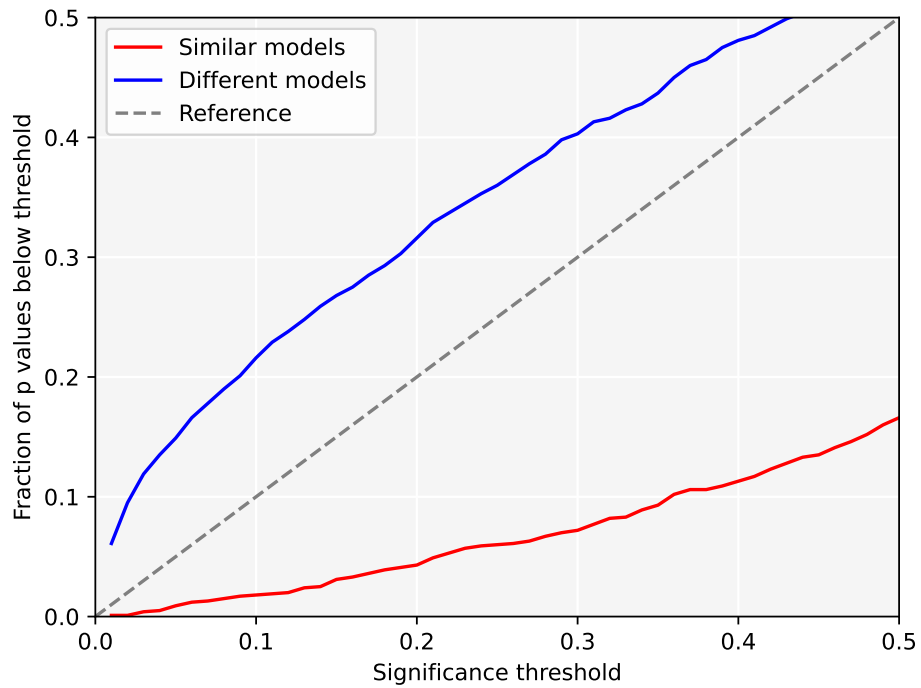

**Figure S1. The probability of paired evaluation rejecting the null hypothesis that two models have the same performance.** Shown is the fraction of p values from 1,000 two-sided Fisher's Exact tests that fall below a given significance threshold. Each p value was derived on a random 80/20 train/test split of the breast cancer dataset (see Results) by comparing the performance of two random forest models trained with identical hyperparameter values (red) or one random forest model and one linear regression model (blue). The expected "no information" rate is presented as a dashed line for reference.

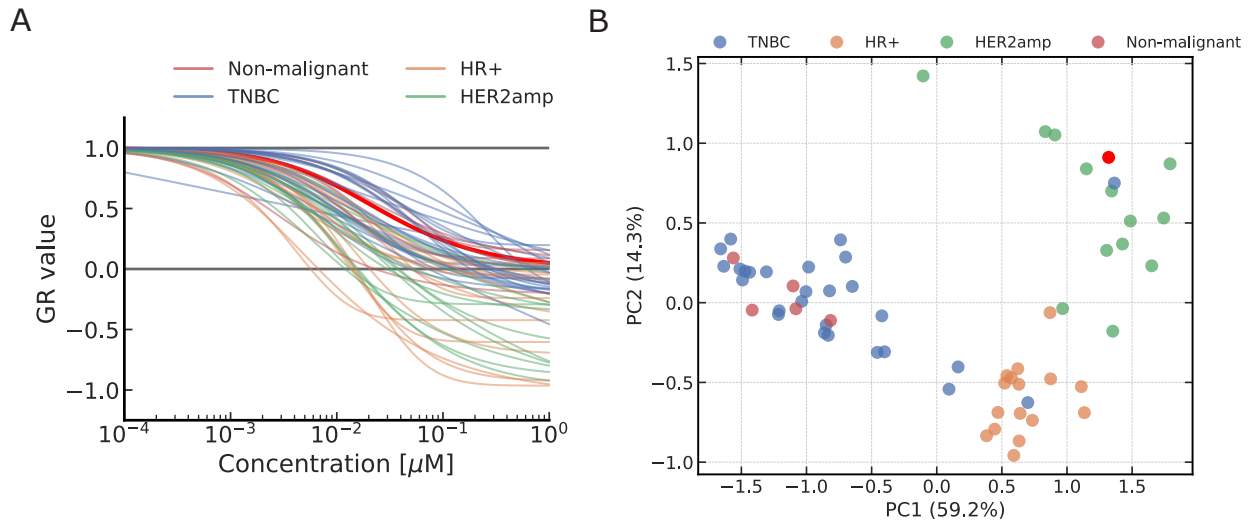

**Figure S2. The location of ZR7530 data relative to other cell lines. A.)** Growth rates curves for torin2 across all breast cancer cell lines. **B.)** Principal components analysis of the baseline RNA-seq data, computed in the space of the top 20 most important genes (Figure 3). The “outlier” cell line ZR7530 is highlighted in red, all other cell lines are colored by their subtypes.

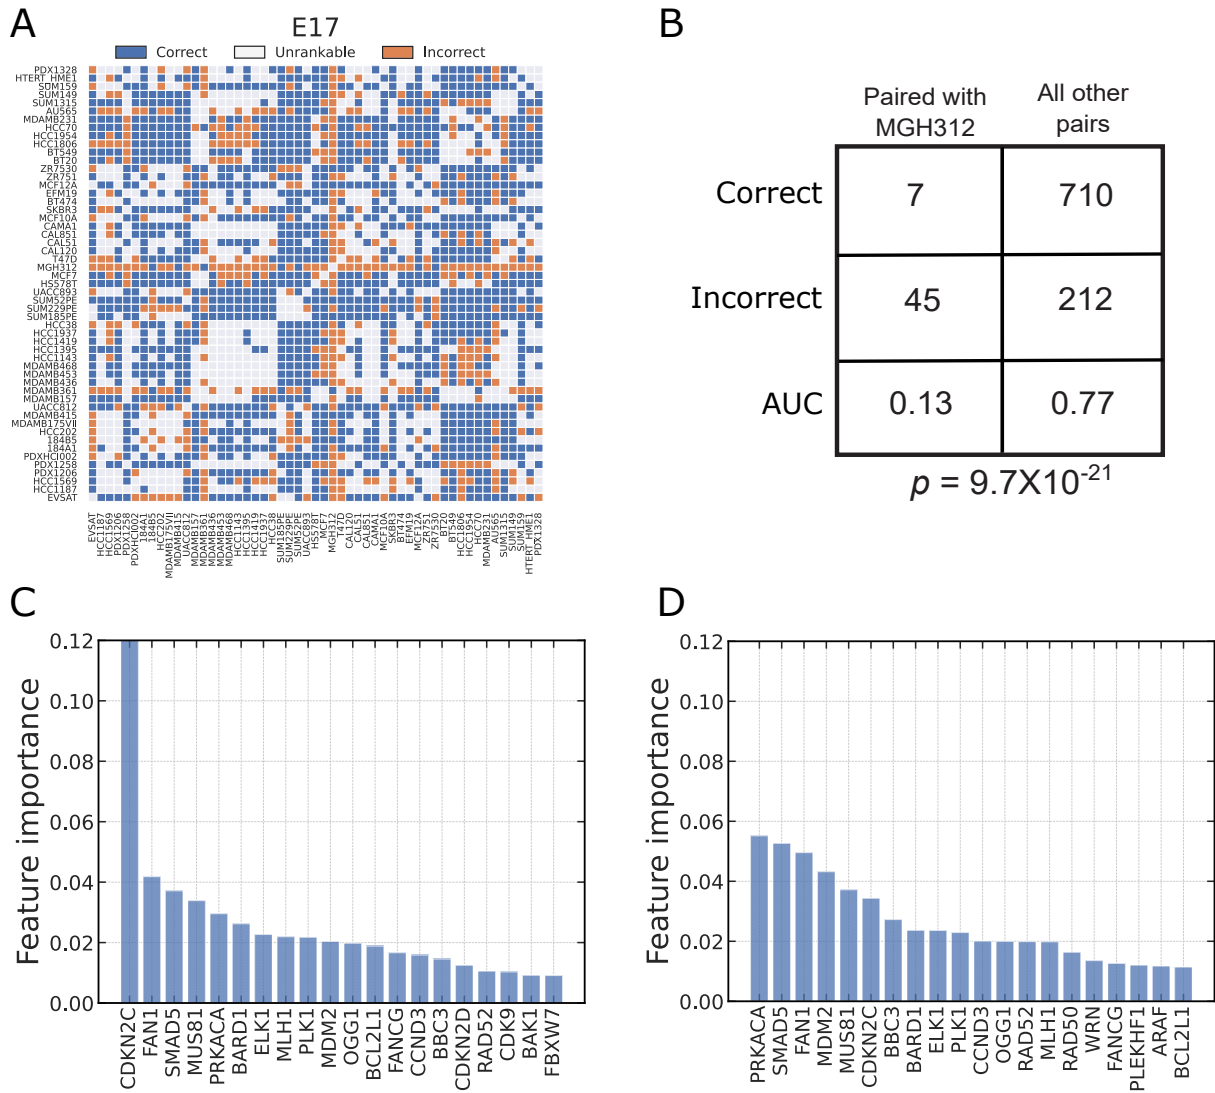

**Figure S3. Outlier detection for E17.** The interpretation of all panels is analogous to Figure 3.

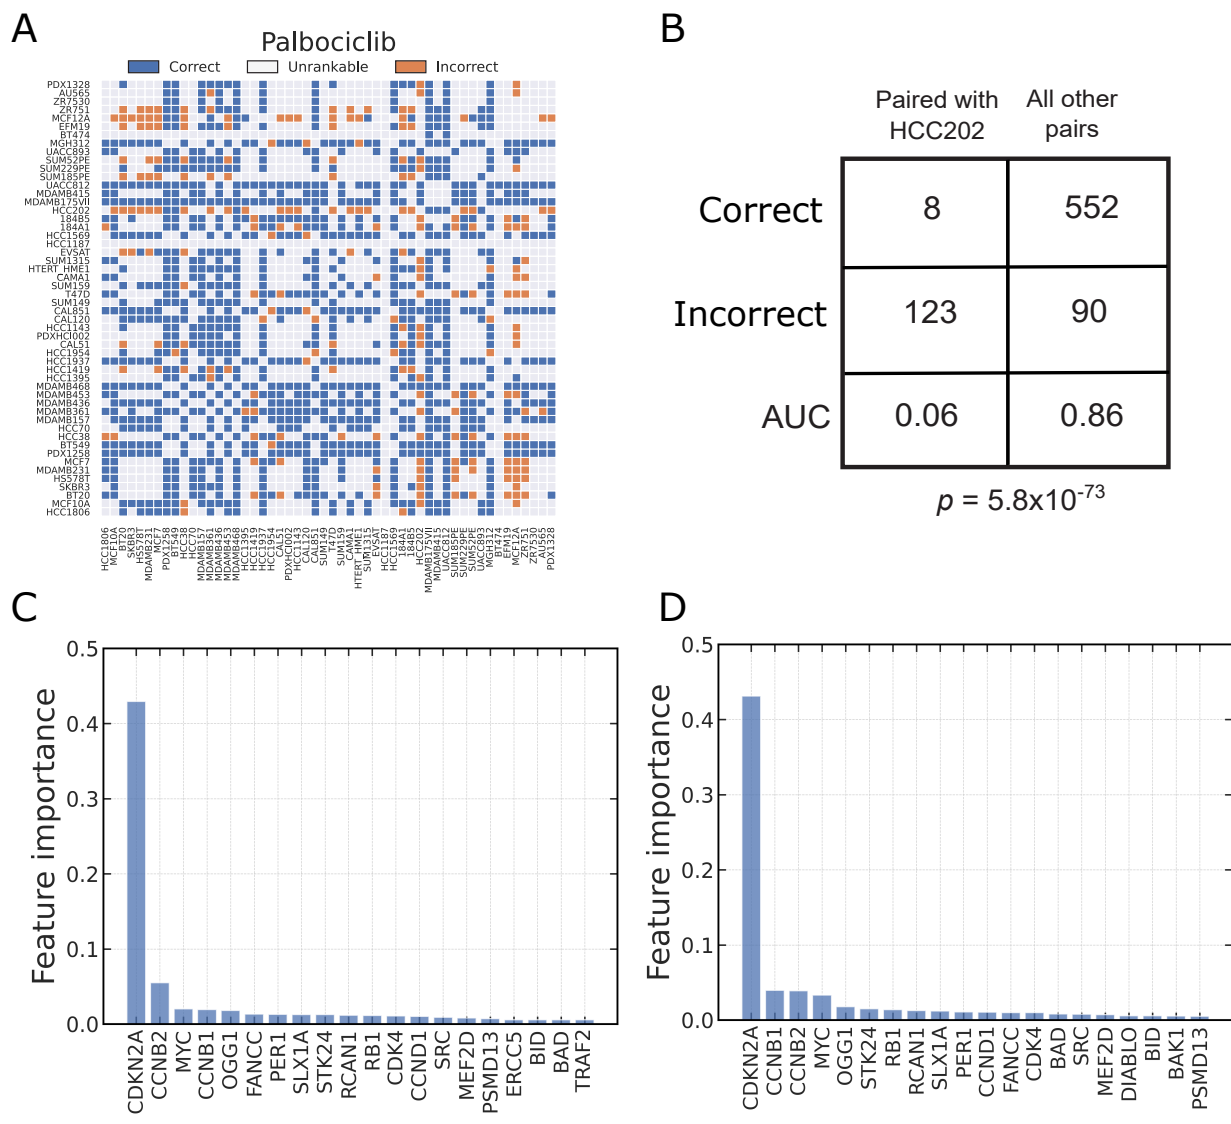

**Figure S4. Outlier detection for palbociclib.** The interpretation of all panels is analogous to Figure 3.

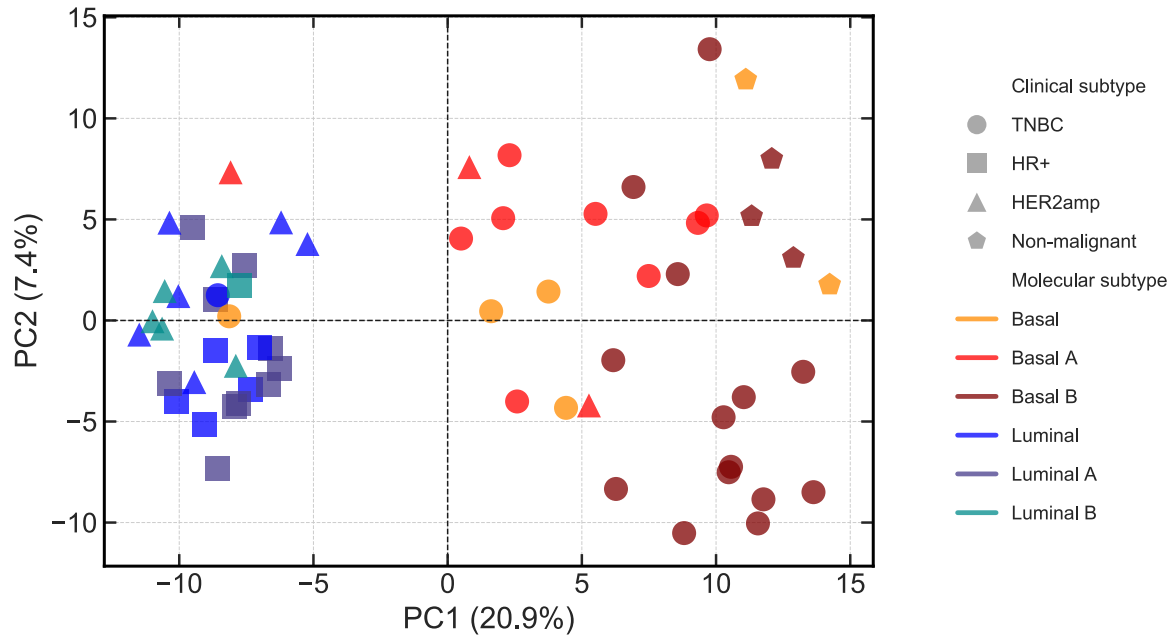

**Figure S5. Principal components analysis of baseline RNAseq expression.** The points represent individual breast cancer cell lines, shaped according to clinical subtype and colored by molecular subtype.

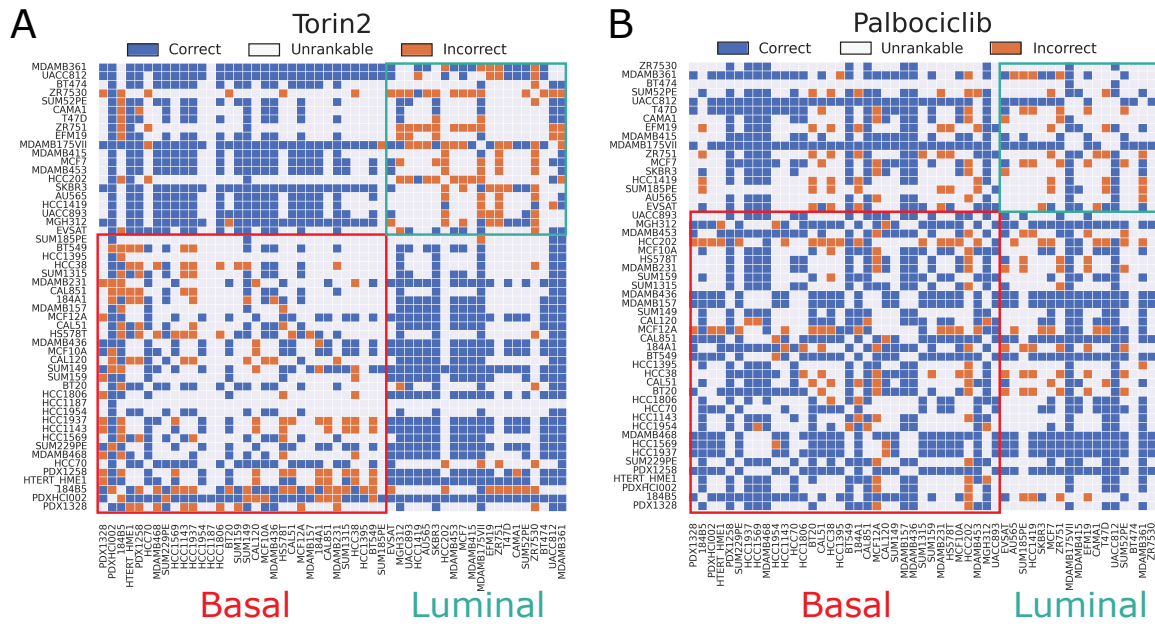

Figure S6. Effect of subtype in model prediction for torin2 and palbociclib.

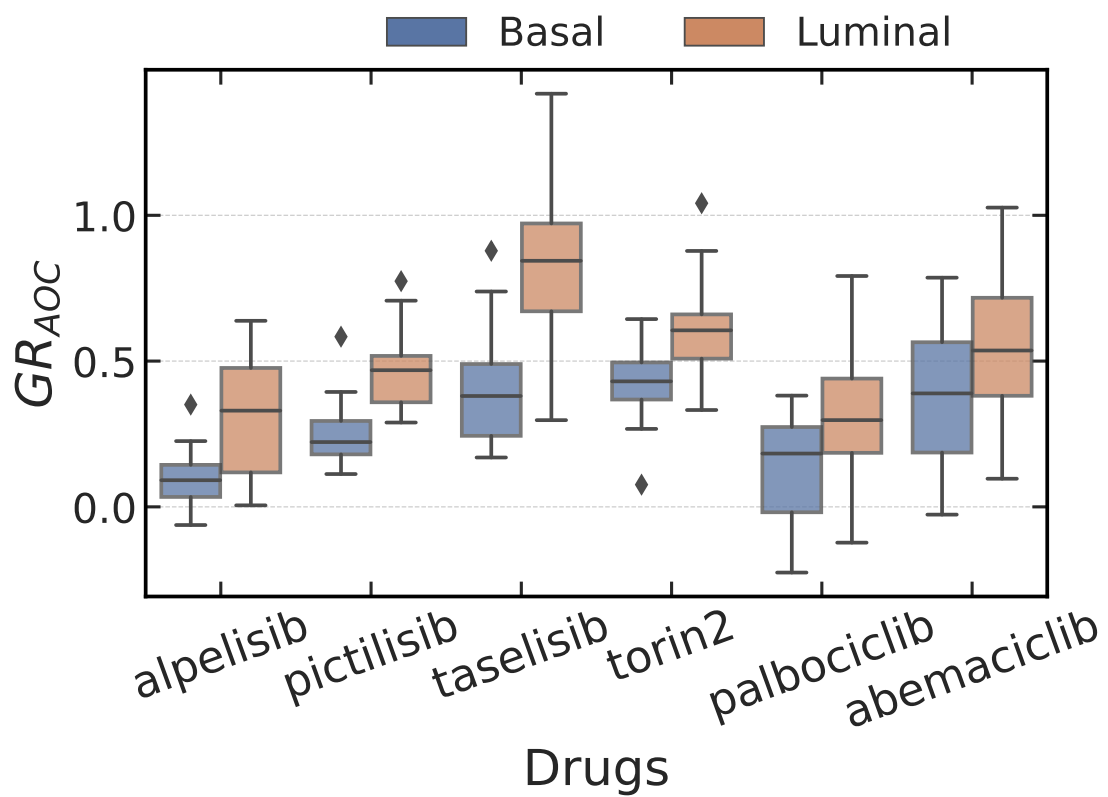

**Figure S7.** The distribution of  $GR_{AOC}$  for selected drugs. The values are plotted separately for basal (blue) and luminal (orange) cell lines.



### Moderate vs mild

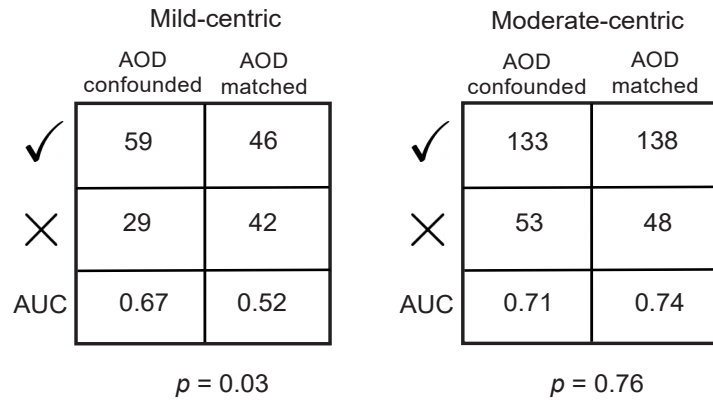

### Moderate vs severe

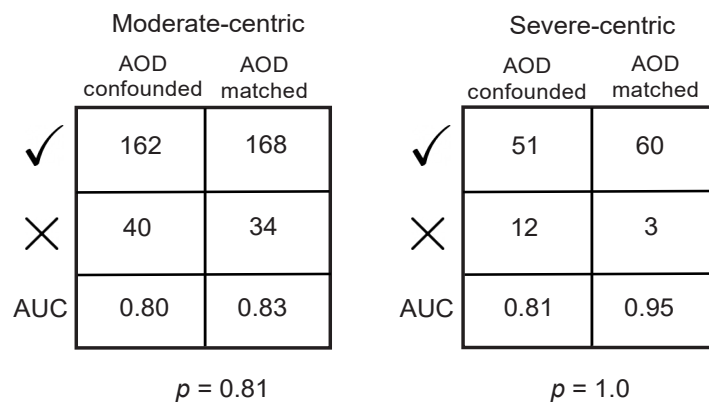

**Figure S8.** 2x2 contingency tables showing the performance of logistic regression models trained to distinguish between mild, moderate and severe stages of Alzheimer's Disease in the presence of Age of Death (AOD) as a confounder.

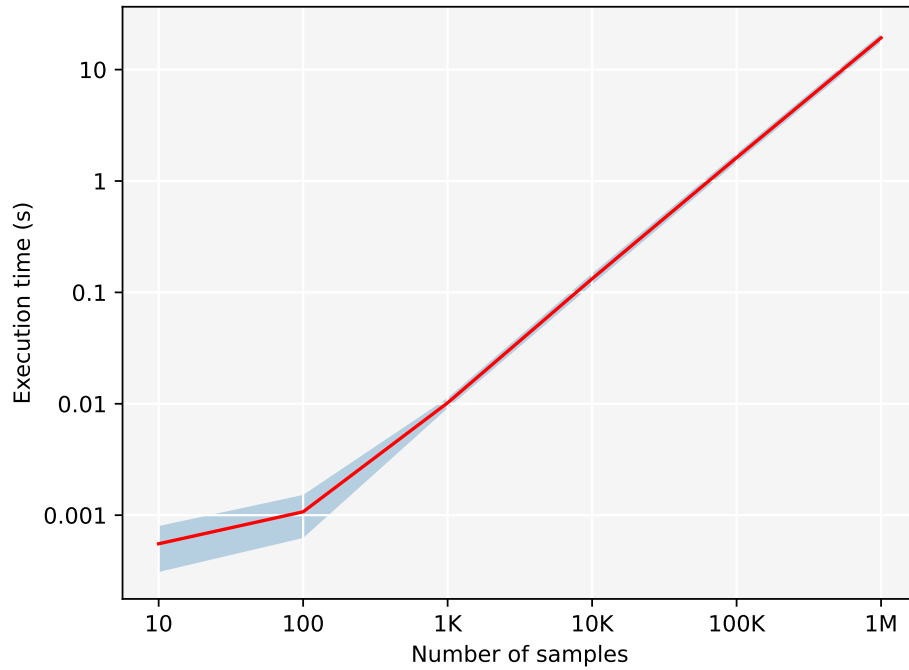

**Figure S9. Execution time of the  $O(n \log n)$  paired evaluation implementation as a function of dataset size.** Shown are statistics collected over 30 runs of the method on randomly-generated sets of scores and labels. The shaded areas (blue) are one standard deviation away from the mean (red). All measurements were made in a standard Gitpod execution environment (4 vCPU, 8GB RAM) using the Python `time()` function.

**Table S1:** The total number of rankable pairs used to evaluate predictors of drug sensitivity from mRNA expression.

| <b>Agent</b>          | <b>Number of pairs</b> | <b>Agent</b>      | <b>Number of pairs</b> |
|-----------------------|------------------------|-------------------|------------------------|
| Paclitaxel            | 443                    | BSJ-01-175        | 616                    |
| Doxorubicin           | 469                    | BSJ-03-123        | 304                    |
| Taselisib_GDC0032     | 714                    | BSJ-03-124        | 435                    |
| Pictilisib_GDC0941    | 358                    | BVD523            | 138                    |
| Torin2                | 389                    | CFI-400945        | 553                    |
| Vorinostat            | 112                    | E17               | 702                    |
| Ipatasertib_GDC0068   | 333                    | FMF-03-145-1      | 705                    |
| Everolimus            | 535                    | FMF-03-146-1      | 42                     |
| Tivantinib_ARQ197     | 125                    | FMF-04-107-2      | 787                    |
| Cabozantinib          | 66                     | FMF-04-112-1      | 7                      |
| Saracatinib_AZD0530   | 296                    | Flavopiridol      | 99                     |
| Dasatinib             | 570                    | GSK2334470        | 366                    |
| Palbociclib_PD0332991 | 428                    | LEE011_Ribociclib | 524                    |
| Dinaciclib_SCH727965  | 224                    | LY2606368         | 747                    |
| AZD7762               | 592                    | LY3023414         | 721                    |
| Olaparib_AZD2281      | 50                     | MFH-2-90          | 837                    |
| Alpelisib_BYL719      | 367                    | Pin1-3            | 50                     |
| A-1210477             | 7                      | R0-3306           | 125                    |
| Buparlisib_NVP-BKM120 | 188                    | Rucaparib         | 198                    |
| INK128_MLN0128        | 526                    | SHP099            | 61                     |
| PF-4708671            | 65                     | SY-1365           | 735                    |
| Neratinib_HKI272      | 588                    | THZ-P1-2          | 356                    |
| Cediranib_AZD2171     | 220                    | THZ-P1-2R         | 37                     |
| Ceritinib_LDK378      | 205                    | THZ1              | 399                    |
| Trametinib_GSK1120212 | 460                    | THZ531            | 352                    |
| Luminespib_NVP-AUY922 | 322                    | YKL-5-124         | 570                    |
| Abemaciclib_LY2835219 | 559                    | ZZ1-33B           | 852                    |
| Volasertib_BI6727     | 363                    | senexin b         | 150                    |
| ABT-737               | 131                    |                   |                        |
| TGX221                | 190                    |                   |                        |
| AZD1775               | 668                    |                   |                        |
| AZD2014               | 693                    |                   |                        |
| AZD5363               | 531                    |                   |                        |
| AZD6738               | 294                    |                   |                        |
| BJP-6-5-3             | 0                      |                   |                        |
| BMS-265246            | 689                    |                   |                        |
